# Supplementary material for: Incidence, Risk Factors, and Outcomes Associated With In-Hospital Acute Myocardial Infarction
Source: PubMed Central journal article supplement (PMC6484558; doi:10.1001/jamanetworkopen.2018.7348), 2019-01-18
Supplement: jamanetwopen-2-e187348-s001.pdf [file jamanetwopen-2-e187348-s001.pdf]

## Supplementary Online Content

Bradley SM, Borgerding JA, Wood GB, Maynard C, Fihn SD. Incidence, risk factors, and outcomes associated with in-hospital acute myocardial infarction. *JAMA Netw Open*. 2019;2(1):e187348. doi:10.1001/jamanetworkopen.2018.7348

**eTable 1.** Model Development for Risk-Factors of In-Hospital Myocardial Infarction

**eTable 2.** Predictors and Outcomes of In-Hospital Acute Myocardial Infarction (IHAMI) Concordance of Data Abstraction—Phase 2 Preliminary Results

**eTable 3.** Predictors and Outcomes of In-Hospital Acute Myocardial Infarction (IHAMI) Concordance of Data Abstraction—Preliminary Phase 3 Results

This supplementary material has been provided by the authors to give readers additional information about their work.

**eTable 1.** Model Development for Risk-Factors of In-Hospital Myocardial Infarction

| Candidate Variables                         | Model 1:<br>Demographics,<br>bed type, and<br>past history | Model 1a:<br>Model 1 +<br>acute<br>conditions | Model 2:<br>Model 1 +<br>vitals | Model 3:<br>Model 1 +<br>labs | Model 4:<br>Significant<br>covariates |
|---------------------------------------------|------------------------------------------------------------|-----------------------------------------------|---------------------------------|-------------------------------|---------------------------------------|
| Gender                                      | 0.16                                                       | 0.13                                          | 0.18                            | 0.13                          |                                       |
| Married                                     | 0.03 *                                                     | 0.03 *                                        | 0.007 *                         | 0.005 *                       | <0.001 *                              |
| Bed type                                    | <0.001 *                                                   | <0.001 *                                      | <0.001 *                        | <0.001 *                      | <0.001 *                              |
| White                                       | 0.39                                                       | 0.4                                           | 0.33                            | 0.46                          |                                       |
| Atrial fibrillation                         | 0.006 *                                                    | 0.005 *                                       | 0.004 *                         | 0.03 *                        | 0.02 *                                |
| Alcohol dependence/abuse                    | 0.19                                                       | 0.16                                          | 0.74                            | 0.39                          |                                       |
| Anemia                                      | 0.05 *                                                     | 0.06 *                                        | 0.06 *                          | <0.001 *                      | <0.001 *                              |
| Obstructive sleep apnea                     | 0.55                                                       | 0.49                                          | 0.65                            | 0.8                           |                                       |
| Prior coronary artery<br>bypass graft       | 0.38                                                       | 0.38                                          | 0.5                             | 0.61                          |                                       |
| Coronary artery disease                     | 0.07 *                                                     | 0.06 *                                        | 0.05 *                          | 0.03 *                        | <0.001 *                              |
| Heart failure                               | 0.42                                                       | 0.54                                          | 0.26                            | 0.28                          |                                       |
| Chronic kidney disease                      | 0.02 *                                                     | 0.02 *                                        | 0.09 *                          | 0.63                          | NS in final<br>model                  |
| Chronic obstructive<br>pulmonary disease    | 0.84                                                       | 0.91                                          | 0.85                            | 0.34                          |                                       |
| Cerebrovascular disease                     | 0.03 *                                                     | 0.03 *                                        | 0.04 *                          | 0.16                          | NS in final<br>model                  |
| Dementia                                    | 0.19                                                       | 0.2                                           | 0.17                            | 0.12                          |                                       |
| Depression                                  | 0.05 *                                                     | 0.05 *                                        | 0.03 *                          | 0.04 *                        | 0.02 *                                |
| Diabetes                                    | 0.58                                                       | 0.49                                          | 0.6                             | 0.8                           |                                       |
| Hypertension                                | 0.57                                                       | 0.56                                          | 0.6                             | 0.46                          |                                       |
| Hyperlipidemia                              | 0.98                                                       | 0.97                                          | 0.93                            | 0.86                          |                                       |
| Liver disease                               | 0.2                                                        | 0.22                                          | 0.31                            | 0.36                          |                                       |
| Malignant neoplasm                          | 0.75                                                       | 0.89                                          | 0.47                            | 0.35                          |                                       |
| Prior myocardial infarction                 | <0.001 *                                                   | <0.001 *                                      | 0.001 *                         | <0.001 *                      | 0.001 *                               |
| Prior percutaneous<br>coronary intervention | 0.24                                                       | 0.26                                          | 0.22                            | 0.33                          |                                       |
| Post-traumatic stress<br>disorder           | 0.88                                                       | 0.91                                          | 0.84                            | 0.92                          |                                       |

| Candidate Variables         | Model 1:<br>Demographics,<br>bed type, and<br>past history | Model 1a:<br>Model 1 +<br>acute<br>conditions | Model 2:<br>Model 1 +<br>vitals | Model 3:<br>Model 1 +<br>labs | Model 4:<br>Significant<br>covariates |
|-----------------------------|------------------------------------------------------------|-----------------------------------------------|---------------------------------|-------------------------------|---------------------------------------|
| Peripheral vascular disease | <0.001 *                                                   | <0.001 *                                      | <0.001 *                        | 0.002 *                       | 0.001 *                               |
| Tobacco use                 | 0.69                                                       | 0.68                                          | 0.63                            | 0.27                          |                                       |
| Coagulopathy                |                                                            | 0.49                                          |                                 |                               |                                       |
| Fluid/electrolyte disorder  |                                                            | 0.39                                          |                                 |                               |                                       |
| Gastrointestinal bleed      |                                                            | 0.53                                          |                                 |                               |                                       |
| Hypoxia                     |                                                            | 0.24                                          |                                 |                               |                                       |
| Body mass index             |                                                            |                                               | 0.33                            |                               |                                       |
| Systolic blood pressure     |                                                            |                                               | 0.14                            |                               |                                       |
| Heart rate                  |                                                            |                                               | <0.001 *                        |                               | <0.001 *                              |
| Blood urea nitrogen         |                                                            |                                               |                                 | 0.09 *                        | 0.01 *                                |
| Creatinine                  |                                                            |                                               |                                 | 0.88                          |                                       |
| Hemoglobin                  |                                                            |                                               |                                 | <0.001 *                      | <0.001 *                              |
| Potassium                   |                                                            |                                               |                                 | 0.57                          |                                       |
| Sodium                      |                                                            |                                               |                                 | 0.47                          |                                       |
| White blood cell count      |                                                            |                                               |                                 | <0.001 *                      | <0.001 *                              |

\* Achieved threshold for inclusion in Model 4 ( $p < 0.10$ )

**eTable 2.** Predictors and Outcomes of In-Hospital Acute Myocardial Infarction (IHAMI)  
Concordance of Data Abstraction – Phase 2 PRELIMINARY Results

| Dataset                    | # Records Entered |         |         | Variable                                                                                                                           | % Agreement     |
|----------------------------|-------------------|---------|---------|------------------------------------------------------------------------------------------------------------------------------------|-----------------|
|                            | Abstr 1           | Abstr 2 | Abstr 3 |                                                                                                                                    |                 |
| <b>Demographics</b>        | 77                | 77      | 77      | <b>Gender</b> ( <i>M, F</i> )                                                                                                      | 86% (66/77)     |
|                            |                   |         |         | <b>Ethnicity</b> ( <i>AA, C</i> )                                                                                                  | 84% (65/77)     |
|                            |                   |         |         | <b>Marital Status</b> ( <i>D, M, N, S, W</i> )                                                                                     | 84% (65/77)     |
| <b>Hospital Details</b>    | 174               | 168     | 165     | <b>Admission Date</b>                                                                                                              | 82% (154/188)   |
|                            |                   |         |         | ➤ <b>Discharge Date</b> <sup>a</sup>                                                                                               | 94% (144/154)   |
| <b>Discharge Diagnoses</b> | 723               | 673     | 743     | <b>Diagnosis</b>                                                                                                                   | 80% (633/787)   |
| <b>Follow-up</b>           | 432               | 435     | 597     | <b>Follow-up Date</b>                                                                                                              | 51% (353/689)   |
|                            |                   |         |         | ➤ <b>Follow-up Type</b> <sup>a</sup><br>( <i>APPT_CARDIOLOGY, APPT_PC, APPT_SURGEON, HOMECARE, TELEHEALTH, TEST_STRESS, etc.</i> ) | 89% (315/353)   |
| <b>In-hospital Meds</b>    | 1495              | 1521    | 1630    | <b>Med Name &amp; Timing</b> ( <i>BEFORE, DISCHARGE, AFTER</i> )                                                                   | 76% (1342/1764) |
|                            |                   |         |         | ➤ <b>Med Route</b> <sup>a</sup> ( <i>INH, INJ, IV, MOUTH, NEB, SL, TOP</i> )                                                       | 92% (1239/1342) |
| <b>Labs</b>                | 1892              | 1847    | 1953    | <b>Lab Name &amp; Date/Time</b>                                                                                                    | 64% (1478/2317) |
| <b>Vitals</b>              | 526               | 548     | 618     | <b>Vital Type and Date/Time</b>                                                                                                    | 53% (396/744)   |

<sup>a</sup> For these variables, the denominator used to calculate the % agreement is based on the number of records that matched across abstractors according to the merging variable(s).

**eTable 3.** Predictors and Outcomes of In-Hospital Acute Myocardial Infarction (IHAMI)  
Concordance of Data Abstraction – Preliminary Phase 3 Results

| Dataset         | # Records |       | Variable                                                                    | % Agreement                |
|-----------------|-----------|-------|-----------------------------------------------------------------------------|----------------------------|
|                 | Abstr     | Abstr |                                                                             |                            |
| Hospital Events | 446       | 360   | All Events ( <i>e.g., Dyspnea, Angina,</i>                                  | 74% (348/472)              |
|                 |           |       | All Events & Dates                                                          | 56% (262/472)              |
|                 |           |       | All Events & When ( <i>Event occurred before/on/after enrollment date</i> ) | 64% (301/472)              |
|                 | 68        | 58    | Dyspnea/Shortness of breath<br>- SOB & When                                 | 94% (66/70)<br>80% (56/70) |
|                 | 31        | 22    | Angina<br>- Angina & When                                                   | 71% (22/31)<br>65% (20/31) |
|                 | 29        | 21    | Hypotension<br>- Hypotension & When                                         | 70% (21/30)<br>57% (17/30) |
|                 |           |       |                                                                             |                            |
| Procedures      | 279       | 260   | All Procedures ( <i>e.g., EKG, Cardiology,</i>                              | 84% (251/299)              |
|                 |           |       | All Procedures & Dates                                                      | 66% (196/299)              |
|                 |           |       | All Procedures & End Dates                                                  | 67% (195/299)              |
|                 |           |       | All Procedures & Physician Deferred                                         | 81% (241/299)              |
|                 |           |       | All Procedures & Patient Declined                                           | 83% (248/299)              |
|                 | 51        | 45    | EKG done<br>- EKG & Date                                                    | 85% (44/52)<br>54% (28/52) |
|                 | 43        | 40    | Cardiology done<br>- Cardiology & Date                                      | 93% (40/43)<br>86% (37/43) |
|                 | 23        | 22    | Transfusion done                                                            | 88% (21/24)                |
|                 | 37        | 37    | - Transfusion & Date                                                        | 48% (21/44)                |
|                 | 36        | 34    | Echo done<br>- Echo & Date                                                  | 84% (32/38)<br>68% (26/38) |
|                 | 26        | 27    | Cath/PCI done                                                               | 96% (26/27)                |
|                 | 32        | 31    | - Cath/PCI & Date                                                           | 73% (24/33)                |
|                 | 17        | 18    | Stress test done<br>- Stress test & Date                                    | 89% (17/19)<br>84% (16/19) |

| Dataset                    | # Records Entered |       | Variable                                                                                          | % Agreement                      |
|----------------------------|-------------------|-------|---------------------------------------------------------------------------------------------------|----------------------------------|
|                            | Abstr             | Abstr |                                                                                                   |                                  |
| <b>Cath Lab Details</b>    | 15                | 15    | Type ( <i>Cath, PCI, Both</i> )                                                                   | 100% (15/15)                     |
|                            |                   |       | Type & Bare metal stent                                                                           | 93% (14/15)                      |
|                            |                   |       | Type & Drug eluting stent                                                                         | 93% (14/15)                      |
|                            |                   |       | Type & Distal protection                                                                          | 100% (15/15)                     |
|                            |                   |       | Type & Thrombus removal                                                                           | 100% (15/15)                     |
|                            | 1                 | 0     | Type & Complications                                                                              | (14/15 w/ no compl)              |
| <b>EKG Details</b>         | 73                | 71    | Type ( <i>e.g., Ischemic changes, Normal, ST-depression, T- wave changes</i> )                    | 57% (52/92)                      |
| <b>Echo Details</b>        | 28                | 26    | Source ( <i>Hospital floor, Cath, Prev Hx</i> )                                                   | 73% (22/30)                      |
|                            |                   |       | EF Percent ( <i>Normal</i> ≥55%, <i>Mild</i> 45-54%, <i>Moderate</i> 30- 44%, <i>Severe</i> <30%) | 60% (18/30)                      |
|                            |                   |       | Wall Motion ( <i>Normal, Abnormal</i> )                                                           | 63% (19/30)                      |
| <b>Stress Test Details</b> | 6                 | 2     | Type ( <i>Nuclear, EKG, Echo</i> )                                                                | Database would not allow partial |
|                            |                   |       | Method ( <i>Pharmacologic, Maximal, Sub-</i>                                                      | -                                |
|                            |                   |       | Result ( <i>Negative, Positive, Equivocal,</i>                                                    | -                                |
|                            |                   |       | Risk ( <i>Low, Medium, High</i> )                                                                 | -                                |
